# Supplementary material for: In vivo antigen delivery by aSalmonella typhimurium type III secretion system for therapeutic cancer vaccines
Source: JCI journal article supplement (doi:10.1172/jci28045), 2006-06-22
Supplement: sd1 [file 1]

**a**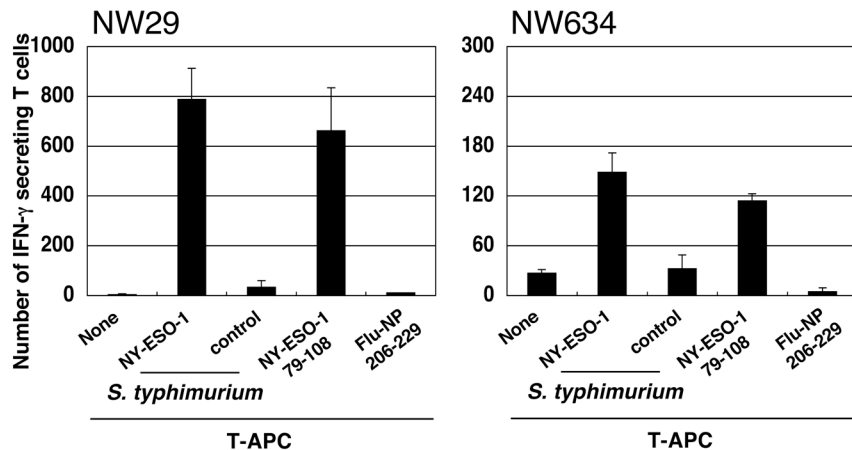**b**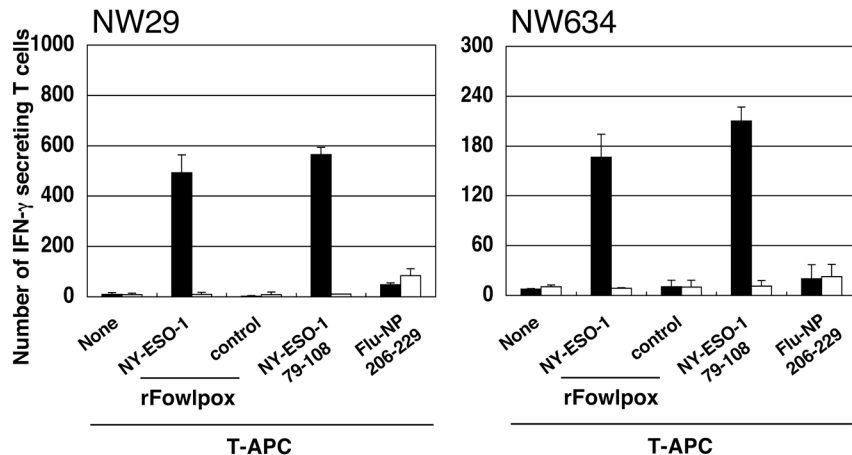

*In vitro* sensitization;  
*S. typhimurium*

■ NY-ESO-1

□ Control Strain

**Supplemental Figure 1. Antigens delivered by *S. typhimurium* type III secretion are presented to CD4<sup>+</sup> T cells**

CD4<sup>+</sup> T cells derived from NW29 and NW634 were pre-sensitized by CD4<sup>-</sup> CD8<sup>-</sup> PBMC (a). pulsed with NY-ESO-1<sub>79-108</sub> peptide or (b). infected with *S. typhimurium*-NY-ESO-1 or *S. typhimurium* control strain as described in Methods. The number of specific CD4<sup>+</sup> T cells was analyzed by ELISPOT assay for recognition of autologous activated T cell APC pulsed with peptides or infected with recombinant *S. typhimurium* or Fowlpox virus. These experiments were performed independently at least twice with similar results. Data are expressed as mean ±SD.
